# Supplementary material
Source: PubMed Central journal article supplement (PMC6401011)
Supplement: mmc1.pdf [file mmc1.pdf]

**Biophysical Journal, Volume 116**

**Supplemental Information**

**Lipid Unsaturation Properties Govern the Sensitivity of Membranes to  
Photoinduced Oxidative Stress**

**Aurélien Bour, Sergei G. Kruglik, Morgan Chabanon, Padmini Rangamani, Nicolas Puff, and Stephanie Bonneau**

Supporting Information for:

## **Lipid unsaturation properties govern the sensitivity of membranes to photo-induced oxidative stress**

Aurélien Bour,<sup>1</sup> Sergei G. Kruglik,<sup>1</sup> Morgan Chabanon,<sup>2</sup> Padmini Rangamani,<sup>2</sup> Nicolas Puff,<sup>3,4</sup> and Stéphanie Bonneau<sup>1,\*</sup>

<sup>1</sup> Sorbonne Université, Faculté des Sciences et Ingénierie, CNRS, Laboratoire Jean Perrin, UMR 8237, 4 place Jussieu, Paris, France.

<sup>2</sup> Department of Mechanical and Aerospace Engineering, University of California San Diego, La Jolla, CA 92093, United States

<sup>3</sup> Sorbonne Université, Faculté des Sciences et Ingénierie, UFR 925, 4 place Jussieu, Paris, France.

<sup>4</sup> Univ Paris Diderot, Sorbonne Paris Cité, CNRS, Laboratoire Matière et Systèmes Complexes (MSC), UMR 7057, 75013, Paris, France.

### **Table of Contents**

|                                                                  |   |
|------------------------------------------------------------------|---|
| S1. OXIDATION OF THE GUVs AND INTRA-TRIAL VARIABILITY .....      | 2 |
| S2. THEORETICAL ANALYSIS OF THE SWELL-BURST CYCLES.....          | 3 |
| S2.1. Evaluation of the membrane permeability to sucrose.....    | 3 |
| S2.2 Relation to osmotic differential in oxidative products..... | 4 |
| S3. DETAILED RTM ANALYSIS.....                                   | 5 |
| S3.1 DOPC vesicles.....                                          | 6 |
| S3.2 DLPC vesicles.....                                          | 7 |
| S3.3 18:1/18:3 vesicles.....                                     | 8 |

### **S1. OXIDATION OF THE GUVs AND INTRA-TRIAL VARIABILITY**

The light activation of the Chlorin e6 (Ce6) induces a photodynamic reaction of type II (singlet oxygen attacks). This is confirmed by the fact that all the samples treated with the Sodium Azide (50 mM) remain stables over light irradiation. Moreover, vesicles of which composition does not react with singlet oxygen do not exhibit any changes in terms of contrast as well as in terms of morphology (Fig. S1). This is the case of the saturated lipid control, the DMPC, but also of the DOPCtrans for which no oxidation signs has been measure, neither in terms of morphology and contrast nor in terms of Raman spectra modifications (see chapter S3 for the details of Raman).

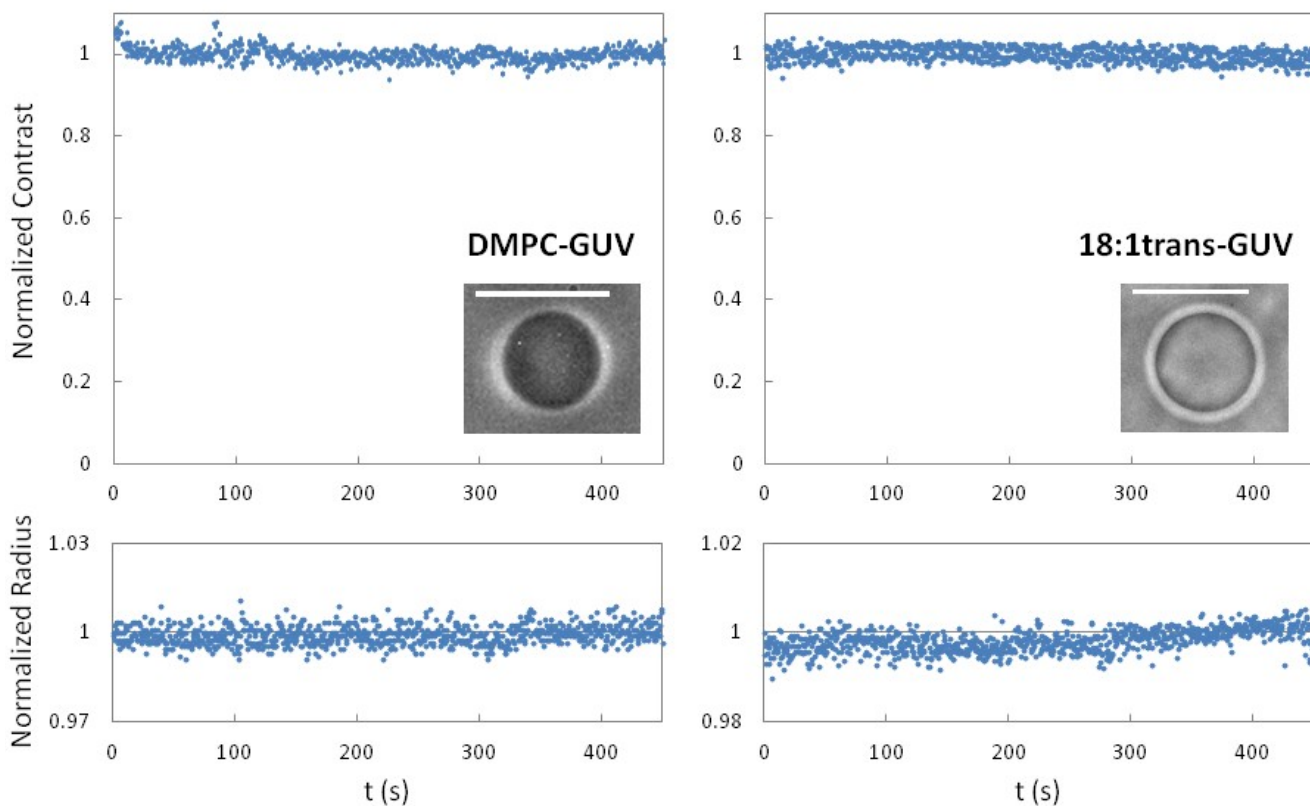

**Figure S1.** Time stability of the optical contrast and radius of Ce6-labelled DMPC- and 18:1trans-GUVs, under light irradiation. (Top) Evolution of the contrast between the inside and the outside of the oxidized vesicles. (Bottom) Vesicle radii remain stable over light activation of the Ce6. (Insets) Image of the vesicles before irradiation. Scale bar = 10  $\mu\text{m}$ .

All the samples contain the same quantity of Ce6 embedded within the lipid membranes, and are irradiated in the same conditions of intensity, duration and fluence. Thus, the dynamics of the induced changes of the GUVs in terms of contrast and morphology is related to (1) the dynamics of the reactions of the lipid membrane of vesicles, i.e. their composition, and (2) the size of the vesicle, since the characteristic diffusion time depends on the distance to be covered, i.e. the radius of the vesicle (see also Eq. S4 below).

Our aim is to study the effect of the membrane composition, and not that of the size of the vesicles. So, we choose to study parameters directly related to the membrane properties, such as permeability and critical strain. For each membrane composition, the images of about twenty vesicles from three sample preparations were analyzed separately. The intra-trial variability of the raw data are given in Fig. S2, where the radii of irradiated and treated vesicles are given, and correlated with the measured characteristic times, for all oxidizable compositions of GUVs. According to the diffusion process, the characteristic time increases with the radius of the vesicle. Moreover, the smaller the permeability the higher the characteristic time is (see Eq. 4). Interestingly, for the 18:3/18:3-GUVs, the values of  $\tau$  change over time from small to high ones, as expected due to the decrease of the oxidized vesicles throughout the stage 2.

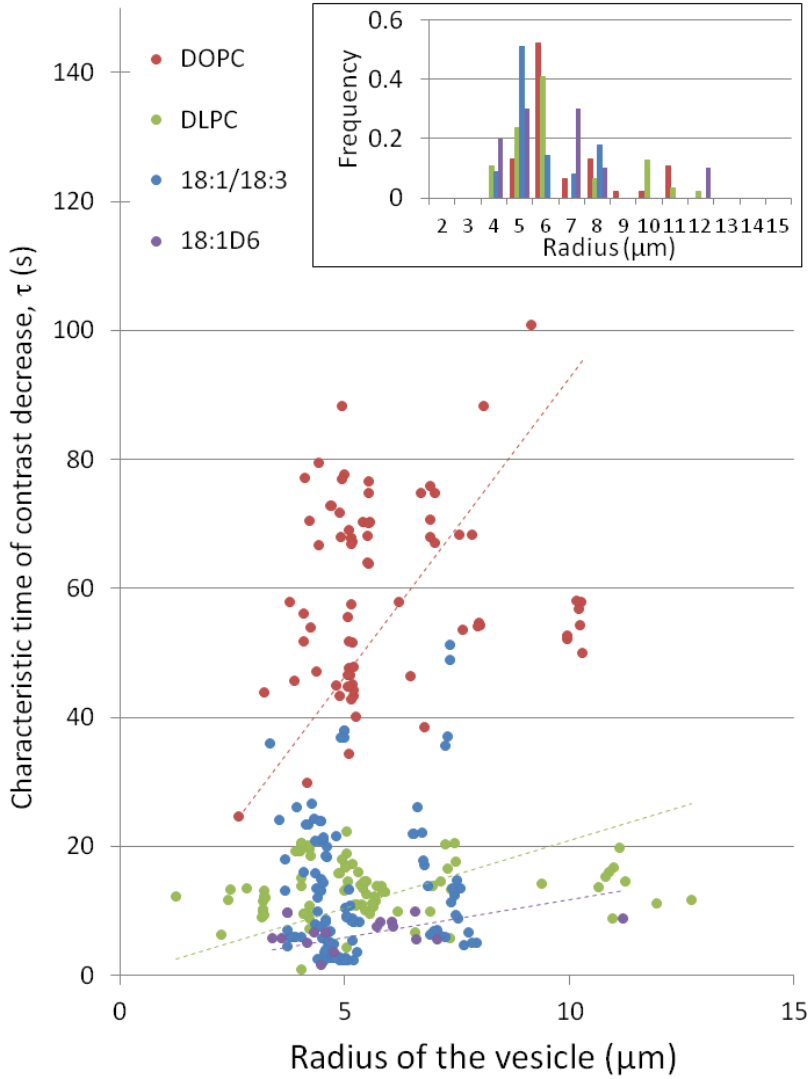

**Figure S2.** Intra-trial variability. The experimental characteristic time of optical contrast decay is depicted as a function of the radii of the vesicles, for 18/1-GUVs (red), 18/2-GUVs (green), 18:1/18:3-GUVs (purple) and 18:1Δ6-GUVs (blue). The radii values are given in inset.

## S2. THEORETICAL ANALYSIS OF THE SWELL-BURST CYCLES

In this section we aim to derive mathematical tools to gain information about the membrane properties based on the measurement of the GUVs contrast decay and radius dynamics. The theoretical framework of this model is based on Chabanon et al. (1).

### S2.1. Evaluation of the membrane permeability to sucrose

We consider a spherical vesicle of volume  $V=4/3\pi R^3$  with an inner sucrose concentration  $c_s$ . The total amount of sucrose in the vesicle is therefore  $Vc_s$ , and varies through (i) permeation through the membrane with a permeability to sucrose  $P_s$ , and (ii) by diffusion/advection through the pore of area  $\pi r^2$  when it is open. Therefore the evolution of sucrose concentration in the vesicle can be written as

$$\frac{d}{dt}(V c_s) = -\pi r^2 \left( D_s \frac{\Delta c_s}{R_0} + v_L c_s \right) - A P_s \Delta c_s, \quad (\text{Eq. S1})$$

where  $D_s$  is the sucrose diffusion coefficient in water,  $\Delta c_s$  is the sucrose concentration differential,  $v_L$  is the leak-out velocity through the pore, and  $A = 4\pi R^2$  is the membrane surface area. Let us consider a particular swell-burst cycle, with cycle number  $n$ . Since the pore lifetime ( $\sim 0.05$  s) is much smaller than the cycles period ( $\sim 10$  s), we assume that the cycle period  $\Delta t_n$  is equal to the time required for the vesicle to swell from the resting radius  $R_{0n}$  to  $R_{fn}$ , the radius at which the membrane ruptures. During that time, the pore is closed so that the first term proportional to the pore radius  $r$  in Equation S1 is zero. Furthermore, the surrounding bath volume is much larger than the vesicle volume and we assume the external sucrose concentration to remain at zero at all times. then Eq. S1 gives us

$$\frac{d}{dt}(V c_s) = \frac{4}{3} \pi R^3 \frac{d c_s}{dt} + c_s 4 \pi R^2 \frac{dR}{dt} \simeq \frac{4}{3} \pi R^3 \frac{d c_s}{dt} + c_s 4 \pi R^2 \frac{\Delta R_n}{\Delta t_n}, \quad (\text{Eq. S2})$$

where  $\Delta R_n = R_{fn} - R_{0n}$ , and  $\Delta t_n$  is the period of the cycle  $n$ . We can rewrite Eq. S1 for the  $n^{\text{th}}$  cycle as

$$\frac{d c_s}{dt} \simeq \frac{-3}{R_{0n}} \left( P_s + \frac{\Delta R_n}{\Delta t_n} \right) c_s, \quad (\text{Eq. S3})$$

where  $R_{0n}$  is the initial vesicle radius of the  $n^{\text{th}}$  cycle. Assuming that the membrane permeability to sucrose is constant within one cycle, we can define the (constant) characteristic time

$$\tau = 1 / \left[ 3 \left( \frac{P_s}{R_0} + \frac{\Delta R_n}{R_0 \Delta t_n} \right) \right], \quad (\text{Eq. S4})$$

so that the sucrose concentration satisfying Eq. S3 follows an exponential decay such as

$$c_s(t) = c_s(t_{0n}) e^{-(t-t_{0n})/\tau}, \quad (\text{Eq. S5})$$

where  $t_{0n}$  is the time at which the cycle starts. Given that  $\Delta R_n$ ,  $\Delta t_n$ ,  $R_{0n}$ , and  $t_{0n}$  are constant quantities that can be measured for each cycle, Eq. S4 can be fitted to each cycle to determine  $\tau$ , and therefore the membrane permeability to sucrose  $P_s$ .

## S2.2 Relation to osmotic differential in oxidative products

Given that sucrose and glucose are initially at equimolar concentration and are permeating through the membrane at a similar rate, they do not contribute to the osmolarity imbalance. Therefore the only solutes responsible for the osmotic swelling of the GUVs are the products released during the oxidation process. Let  $\Delta c_p$  denote the concentration difference of oxidative products across the membrane responsible for the osmotic imbalance. The volume conservation of the vesicle can be written as

$$\frac{dV}{dt} = A \frac{P_w v_w}{k_B T N_A} (k_B T N_A \Delta c_p - \Delta p_{Lap}) - \pi r^2 v_L, \quad (\text{Eq. S6})$$

where  $P_w$  the membrane permeability to water,  $\Delta p_{Lap} = 2\sigma/R$  is the Laplace pressure with  $\sigma$  being the membrane tension,  $v_w$  is the molar volume of water, and  $k_B$ ,  $T$ , and  $N_A$  are the Boltzmann constant, the bath temperature, and the Avogadro's number respectively.

Once again, we consider the evolution of the vesicle volume during the swelling stage of a cycle number  $n$ . Furthermore, we assume that the osmotic pressure dominates the swelling phase ( $k_B T N_A \Delta c_p \gg \Delta p_{Lap}$ ) so that Laplace pressure is neglected. This assumption is supported by the fact that the radii increase are quasi-linear (see Figure 3). We get

$$\frac{dR}{dt} = P_w v_w \Delta c_p \quad . \quad (\text{Eq. S7})$$

Assuming the oxidative product concentration increases linearly during the time of a cycle, we have

$$\int_0^{\Delta t} \Delta c_p dt = \int_0^{\Delta t} (\alpha_n t + \Delta c_{pn0}) dt = \frac{\alpha_n}{2} \Delta t^2 + \Delta c_{pn0} \Delta t \quad , \quad (\text{Eq. S8})$$

where  $\alpha_n$  is the production rate of oxidative products (mol/m<sup>3</sup>/s), and  $\Delta c_{pn0}$  is the initial oxidative product concentration of cycle number n. We therefore deduce from Eqs. S7 and S8

$$\frac{\Delta R_n}{\Delta t_n} = P_w v_w \left( \frac{\alpha_n}{2} \Delta t + \Delta c_{pn0} \right) \quad . \quad (\text{Eq. S9})$$

Our measures show that  $\Delta R_n/\Delta t_n$  decreases with increasing cycle numbers. Two scenarios can be considered: (i) the production of oxidative products happens mainly at early time and is then zero for most of the process ( $\alpha_n=0$ ). In that case  $\Delta c_{pn0}$  decreases at each circle by leak-out through the transient pore, in a process similar to the osmotic swell-burst cycle described in Chabanon et al (1). Assuming  $P_w v_w$  constant, the drop in oxidative product at each cycle can therefore be estimated from the measure of  $\Delta R_{n+1}/\Delta t_{n+1} - \Delta R_n/\Delta t_n$ . In scenario (ii), oxidative products are released during the course of the swell-burst cycles ( $\alpha_n>0$ ). Given the Raman kinetics, it is likely that the release rate  $\alpha_n$  decreases at each cycle. Note that because  $\alpha_n \Delta t_n$  is positive, this second scenario still implies that  $\Delta c_{pn0}$  decreases at each cycle by leak-out through the pore.

### S3. DETAILED RTM ANALYSIS

The characteristic photo-induced changes vary depending on the degree of unsaturation. In general, the following bands have been detected and quantified:

| Frequency range | Assignment                                                                                                    |
|-----------------|---------------------------------------------------------------------------------------------------------------|
| 1720 – 1750     | $\nu(\text{C=O})$ in ester COOR                                                                               |
| 1665 – 1675     | $\nu(\text{C=C})_{\text{trans}}$ in acyl chain                                                                |
| 1650 – 1660     | $\nu(\text{C=C})_{\text{cis}}$ in acyl chain                                                                  |
| 1430 – 1470     | Scissoring $\delta(\text{CH}_2, \text{CH}_3)$ in acyl chain                                                   |
| 1295 – 1305     | twisting $\delta(\text{CH}_2)$ in acyl chain                                                                  |
| 1260 – 1270     | rocking $\delta(=\text{CH}_2)_{\text{cis}}$ in acyl chain                                                     |
| 1050 – 1180     | $\nu(\text{C-C})$ in acyl chain                                                                               |
| 950 – 1000      | $\nu_{\text{as}}(\text{O-C-C-N}^+)$ , wagging $\delta(=\text{CH}_2)$                                          |
| 820 – 900       | $\nu_{\text{s}}(\text{O-C-C-N}^+)$ , $\nu_{\text{as}}(\text{C}_4\text{-N}^+)$ , rocking $\delta(\text{CH}_2)$ |
| 840 – 880       | peroxide $\nu(\text{O-O})^a$                                                                                  |
| 717             | $\nu_{\text{s}}(\text{C-N}^+)$ of polar head                                                                  |

**Table S1.** Frequencies (cm<sup>-1</sup>) and assignment (2, 3) of the major bands in Raman spectra of lipid vesicles studied.  $\nu$  = stretching mode (s, symmetric; as, asymmetric).  $\delta$  = deformation bending mode (in-plane: scissoring or rocking; out-of-plane: twisting or wagging). <sup>a</sup>Assignment of transient peroxide band region according to Vacque & al. (4).

The DMPC is an unsaturated lipid, used here as control. No changes have ever taken place, as expected. More interestingly, nothing was detected for 18:1 trans vesicles (Fig. S3) up to 600s.

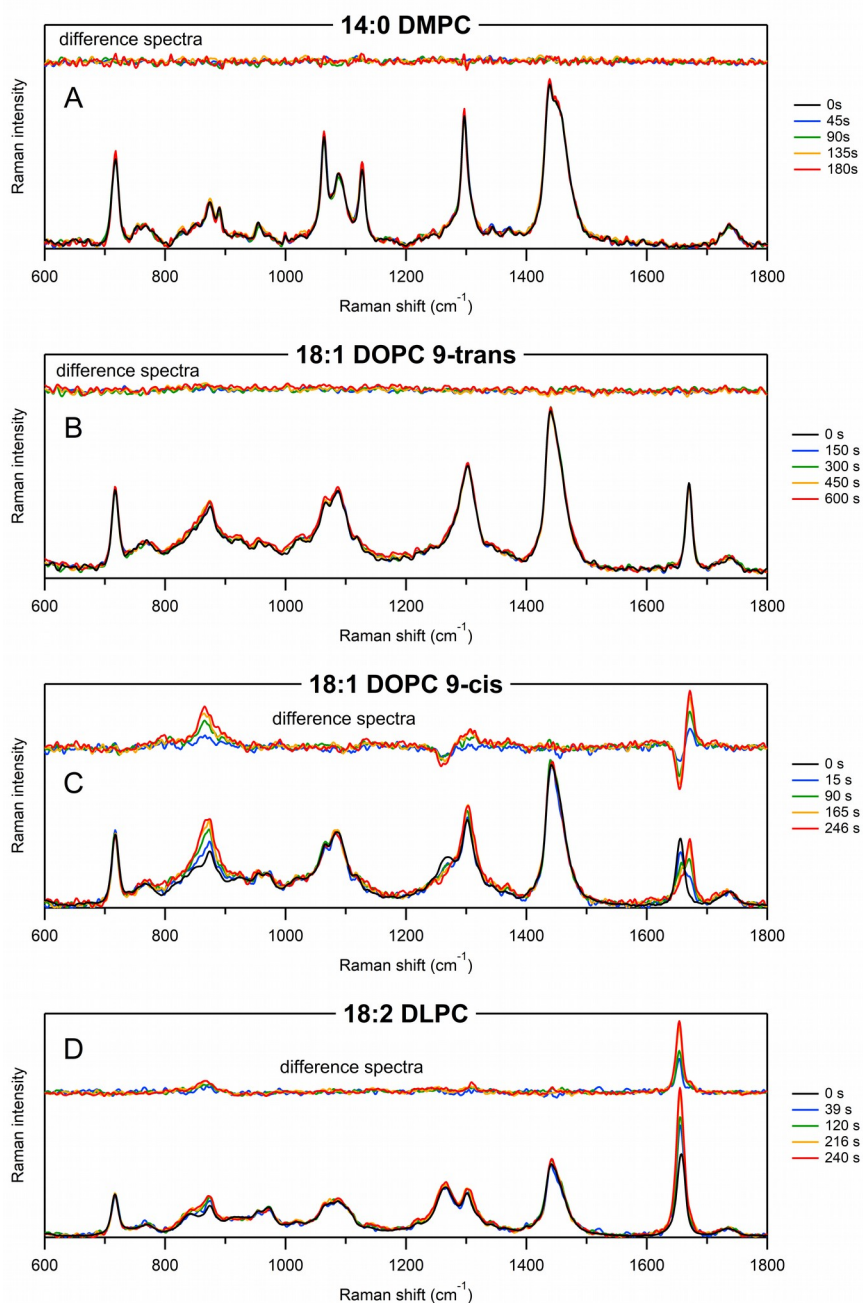

**Figure S3.** Normalized Raman spectra of various lipid vesicles in interaction with Ce6 residing within the optical trap: DMPC (panel A), 9-trans DOPC (panel B), 9-cis DOPC (panel C), and DLPC (panel D). Each panel contains 5 representative spectra recorded at various time delays after the beginning of the measurements; time delays are indicated at the right side of each panel by different colors. Upper part of each panel contains 4 difference spectra obtained by the (1:1) subtraction of the 0 s spectrum from the corresponding Raman spectra at various time delays. Accumulation time for any one Raman spectrum was 3 s.

### S3.1 DOPC vesicles

In the case of DOPC, the most pronounced spectral changes occur in three spectral regions associated with: (i) carbon double-bond stretching  $\nu(\text{C}=\text{C})$ , in 1650-1675  $\text{cm}^{-1}$ ; (ii) rocking deformation  $\delta(=\text{CH}_2)$  at 1265  $\text{cm}^{-1}$ , also involving the carbon double bond; and (iii) peroxide  $\nu(\text{O}-\text{O})$  stretch (4), which appears in difference Raman spectra within 840-880  $\text{cm}^{-1}$ . The observed spectral changes reveal two major photo-induced processes that occur in lipid membrane after Ce6 photo-activation: *cis-trans* isomerization and peroxide formation.

*Cis-trans* isomerization is characterized by the decrease of  $\nu(\text{C}=\text{C})_{\text{cis}}$  band intensity at 1655  $\text{cm}^{-1}$  with simultaneous increase of the  $\nu(\text{C}=\text{C})_{\text{trans}}$  band intensity at 1670  $\text{cm}^{-1}$  which is a characteristic frequency of the *trans*-species (5). The corresponding difference Raman spectra contain characteristic, rather symmetric dispersive contour with the minimum at 1655  $\text{cm}^{-1}$  and the maximum at 1670  $\text{cm}^{-1}$ ; this contour becomes more and more pronounced with the lapse of time. The appearance of *trans*-DOPC species occurs immediately (within 3 s time resolution of our experiment) after photo-excitation. It takes about 54 s for  $\nu(\text{C}=\text{C})_{\text{trans}}$  band to become equal in intensity with the  $\nu(\text{C}=\text{C})_{\text{cis}}$  band. It is important to note that the total Raman intensity within the range 1600-1700  $\text{cm}^{-1}$ , containing  $\nu(\text{C}=\text{C})$  stretch of both *cis*- and *trans*-DOPC, remains roughly the same with a weak tendency to the increase with time, revealing that no other, besides these two, major transient structural species is involved. The Raman intensity of rocking deformation  $\delta(=\text{CH}_2)_{\text{cis}}$  in the 1260-1270  $\text{cm}^{-1}$  range experiences kinetic changes very similar to those of  $\nu(\text{C}=\text{C})_{\text{cis}}$ , but with a decreased magnitude.

Peroxide formation in DOPC vesicles has been revealed by substantial increase of Raman intensity in the characteristic  $\nu(\text{O}-\text{O})$  frequency range 840-880  $\text{cm}^{-1}$  (4). Since this spectral region is congested by numerous Raman bands (Table S2), the kinetic changes have been analyzed from difference Raman spectra obtained by subtraction of normalized Raman spectra of vesicles with and without addition of Ce6. Peroxide species appear immediately (within our 3 s time resolution) after photo-excitation with very high amplitude (~35%) suggesting that the process of peroxide formation is very efficient from the very beginning.

The influence of the carbon double-bond position on lipids oxidation has been studied for the vesicles consisting of DOPC $\Delta$ 6. The general picture of Raman intensity changes was found to be quite similar to the previous case of DOPC; however some notable differences were observed as well. In particular, the process of *cis-trans* isomerization proceeds much faster in DOPC $\Delta$ 6: it takes ~20 seconds for  $\nu(\text{C}=\text{C})_{\text{trans}}$  band to become equal in intensity with the  $\nu(\text{C}=\text{C})_{\text{cis}}$  band, versus ~54 seconds for DOPC. At the same time, it is interesting to note that the fast components of peroxide kinetics are rather similar for DOPC and DOPC $\Delta$ 6: in both cases it takes about 20 seconds to reach the 50% level of peroxide band intensity.

Another very interesting observation consists in the following: no photo-induced changes in Raman spectra of vesicles consisting of DOPC*trans* were observed at any time delay after irradiation beginning. This finding suggests that the peroxide formation requires *cis*-configuration of the carbon double bond in monoene lipids in the presence of activated Ce6.

### S3.2 DLPC vesicles

For DLPC vesicles, in addition to peroxide formation, we observe increase of C=C stretching band instead of *cis-trans* isomerization. Indeed, the  $\nu(\text{C}=\text{C})_{\text{cis}}$  band at 1657  $\text{cm}^{-1}$  experiences strong intensity enhancement with the lapse of time, along with the small frequency downshift to 1654  $\text{cm}^{-1}$ . It is known that, in normal conditions, there exists a linear relationship between the number of C=C bonds and the intensity ratio  $R = I(\nu_{1667}) / I(\delta_{1444})$  (2, 6). After normalization of this ratio R to 2 double bonds in the case of DLPC without Ce6, from normalized Raman spectra at different time delays, we obtained  $R=3$  at  $\Delta t=80$  s and even  $R\sim 3.7$  at  $\Delta t=280$  s,



with the kinetics being stabilized around this value for longer time delays. Thus, our Raman data suggest that Ce6 photosensitizer activation causes the increase of the number of C=C double bonds in linoleic chain, or, more probably their delocalization and conjugation, in DLPC-vesicles. At this early stage, the intensity of the band at  $1264\text{ cm}^{-1}$  remains unchanged with respect to that of non-conjugated DLPC (5, 7).

It should be noted that in some experiments (data, not shown), when the experiment was extended to longer time delays, we eventually observed the reverse process of moderate intensity decrease of the  $\nu(\text{C}=\text{C})_{\text{cis}}$  stretch at  $1654\text{ cm}^{-1}$  with concomitant appearance of weak *trans*-species manifested by a shoulder at  $1670\text{ cm}^{-1}$  and the intensity decrease of the  $\delta(\text{=CH}_2)_{\text{cis}}$  deformation band at  $1264\text{ cm}^{-1}$ .

The initial peroxide formation for DLPC vesicles (Fig. 5F) is again very rapid, within 1-2 time points (3-6 seconds), although being less efficient (<20%) than in the case of monoenes (30-35%, Fig. 5B,D). In the case of DLPC vesicles, it takes more than 150 seconds to reach the 50% level of peroxide band maximal intensity (Fig. 5F) in contrast to ~20 seconds in the case of DOPC vesicles (Fig. 5B).

### S3.3 18:1/18:3 vesicles

Finally, in the case of the vesicles containing lipids mixture 18:3/18:1, the observed spectral changes and kinetics are rather complicated. In addition to a superposition of photoinduced processes observed for DOPC and DLPC, namely *cis-trans* isomerization, C=C double bond delocalization and conjugation, and peroxide formation, we observe also a cyclization reaction. Indeed, the creation of a six-membered (toluene-like) ring is manifested by the appearance of strong and narrow characteristic Raman bands at 1000, 1031, and  $1596\text{ cm}^{-1}$ . Moreover, the kinetics of photoinduced changes vary from one measurement to the other reflecting the competition of simultaneously occurring processes; one set of the observed kinetics is shown in Fig. 6.

## REFERENCES

1. Chabanon, M., J.C.S. Ho, B. Liedberg, A.N. Parikh, and P. Rangamani. 2017. Pulsatile Lipid Vesicles under Osmotic Stress. *Biophys. J.* 112: 1682–1691.
2. Czamara, K., K. Majzner, M.Z. Pacia, K. Kochan, A. Kaczor, and M. Baranska. 2015. Raman spectroscopy of lipids: a review. *Journal of Raman Spectroscopy.* 46: 4–20.
3. Cherney, D.P., J.C. Conboy, and J.M. Harris. 2003. Optical-Trapping Raman Microscopy Detection of Single Unilamellar Lipid Vesicles. *Anal. Chem.* 75: 6621–6628.
4. Vacque, V., B. Sombret, J.P. Huvenne, P. Legrand, and S. Suc. 1997. Characterisation of the O-O peroxide bond by vibrational spectroscopy. *Spectrochimica Acta Part A: Molecular and Biomolecular Spectroscopy.* 53: 55–66.
5. Muik, B., B. Lendl, A. Molina-Díaz, and M.J. Ayora-Cañada. 2005. Direct monitoring of lipid oxidation in edible oils by Fourier transform Raman spectroscopy. *Chemistry and Physics of Lipids.* 134: 173–182.
6. Weng, Y.-M., R.-H. Weng, C.-Y. Tzeng, and W. Chen. 2016. Structural Analysis of Triacylglycerols and Edible Oils by Near-Infrared Fourier Transform Raman Spectroscopy: *Applied Spectroscopy.* .
7. Meksiarun, P., Y. Maeda, T. Hiroi, B.B. Andriana, and H. Sato. 2015. Analysis of the effects of dietary fat on body and skin lipids of hamsters by Raman spectroscopy. *Analyst.* 140: 4238–4244.
